# Supplementary material for: Whole-Exome Sequencing Reveals a Rapid Change in the Frequency of Rare Functional Variants in a Founding Population of Humans
Source: PubMed Central journal article supplement (PMC3784517; doi:10.1371/journal.pgen.1003815), 2013-09-26

## Nucleotidic changes

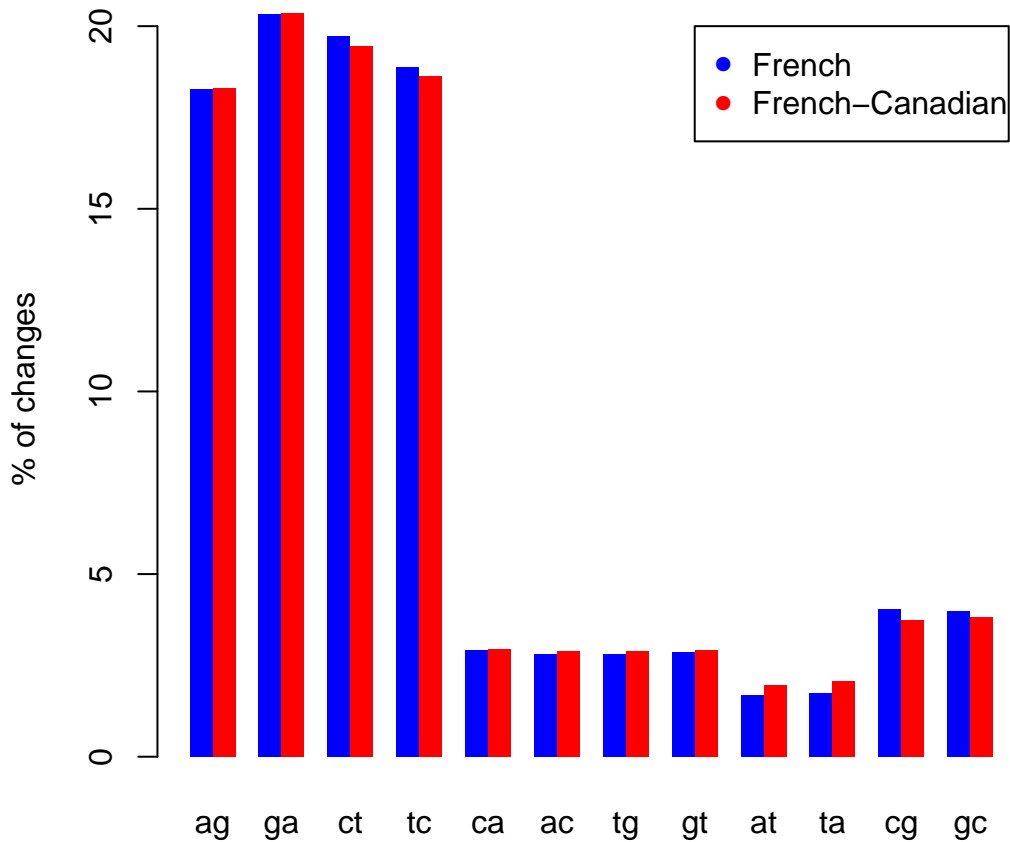

Supplement: pgen.1003815.s008.pdf [file pgen.1003815.s008.pdf]
